# Supplementary material for: The Rpv3-3 Haplotype and Stilbenoid Induction Mediate Downy Mildew Resistance in a Grapevine Interspecific Population
Source: PubMed Central journal article supplement (PMC6414455; doi:10.3389/fpls.2019.00234), 2019-03-06

**Figure S4.** The parental and the consensus MxT linkage map.

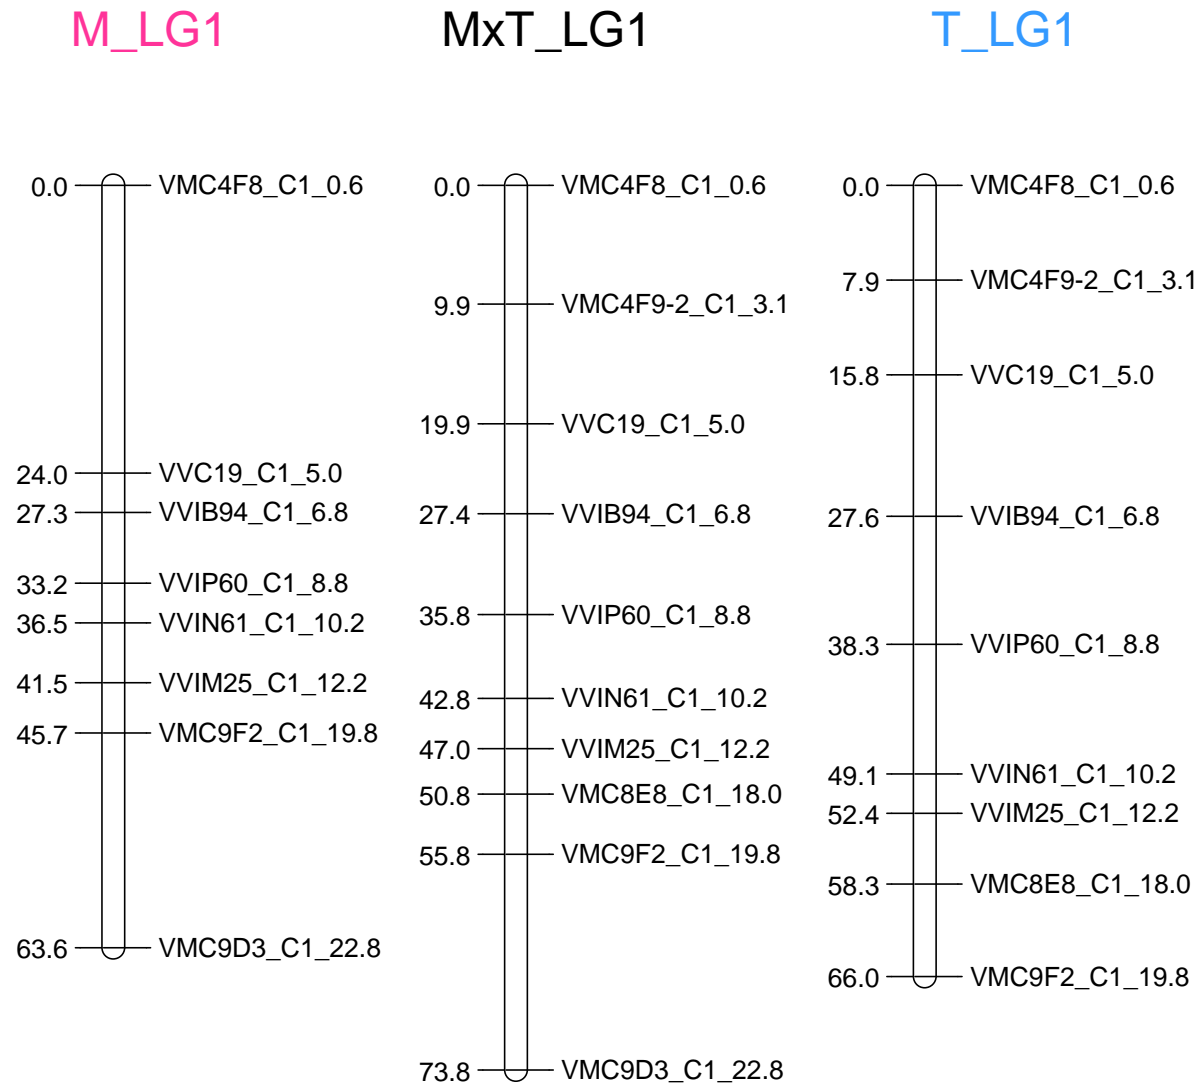

**Figure S4.** The parental and the consensus MxT linkage map.

M\_LG2

MxT\_LG2

T\_LG2

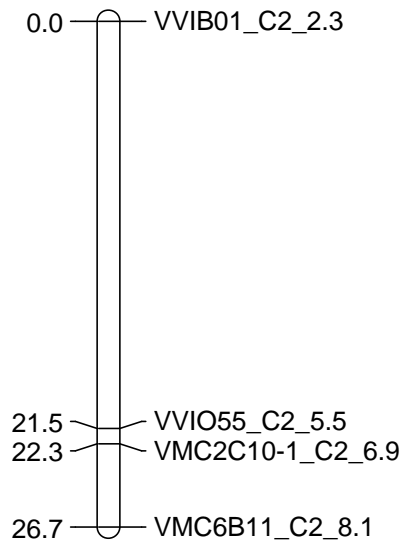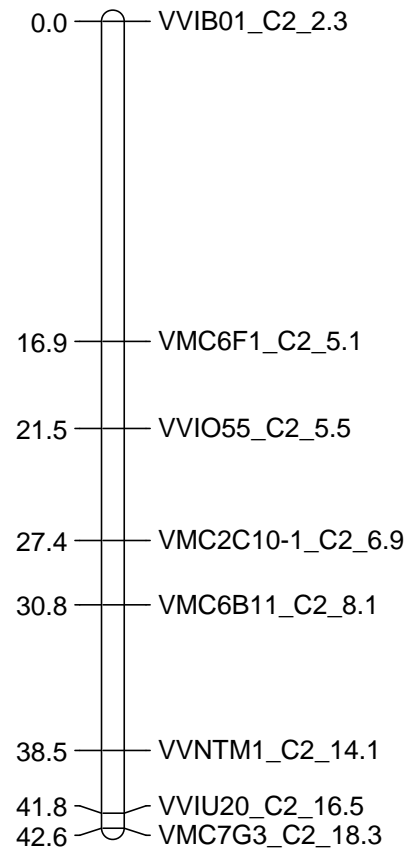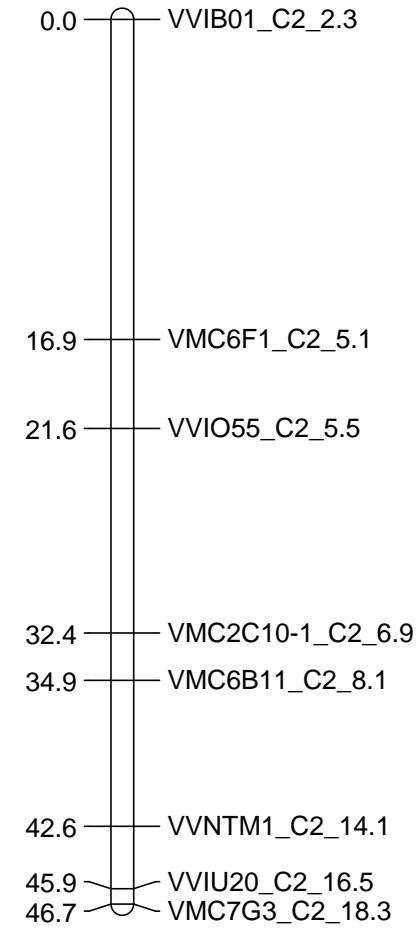

**Figure S4.** The parental and the consensus MxT linkage map.

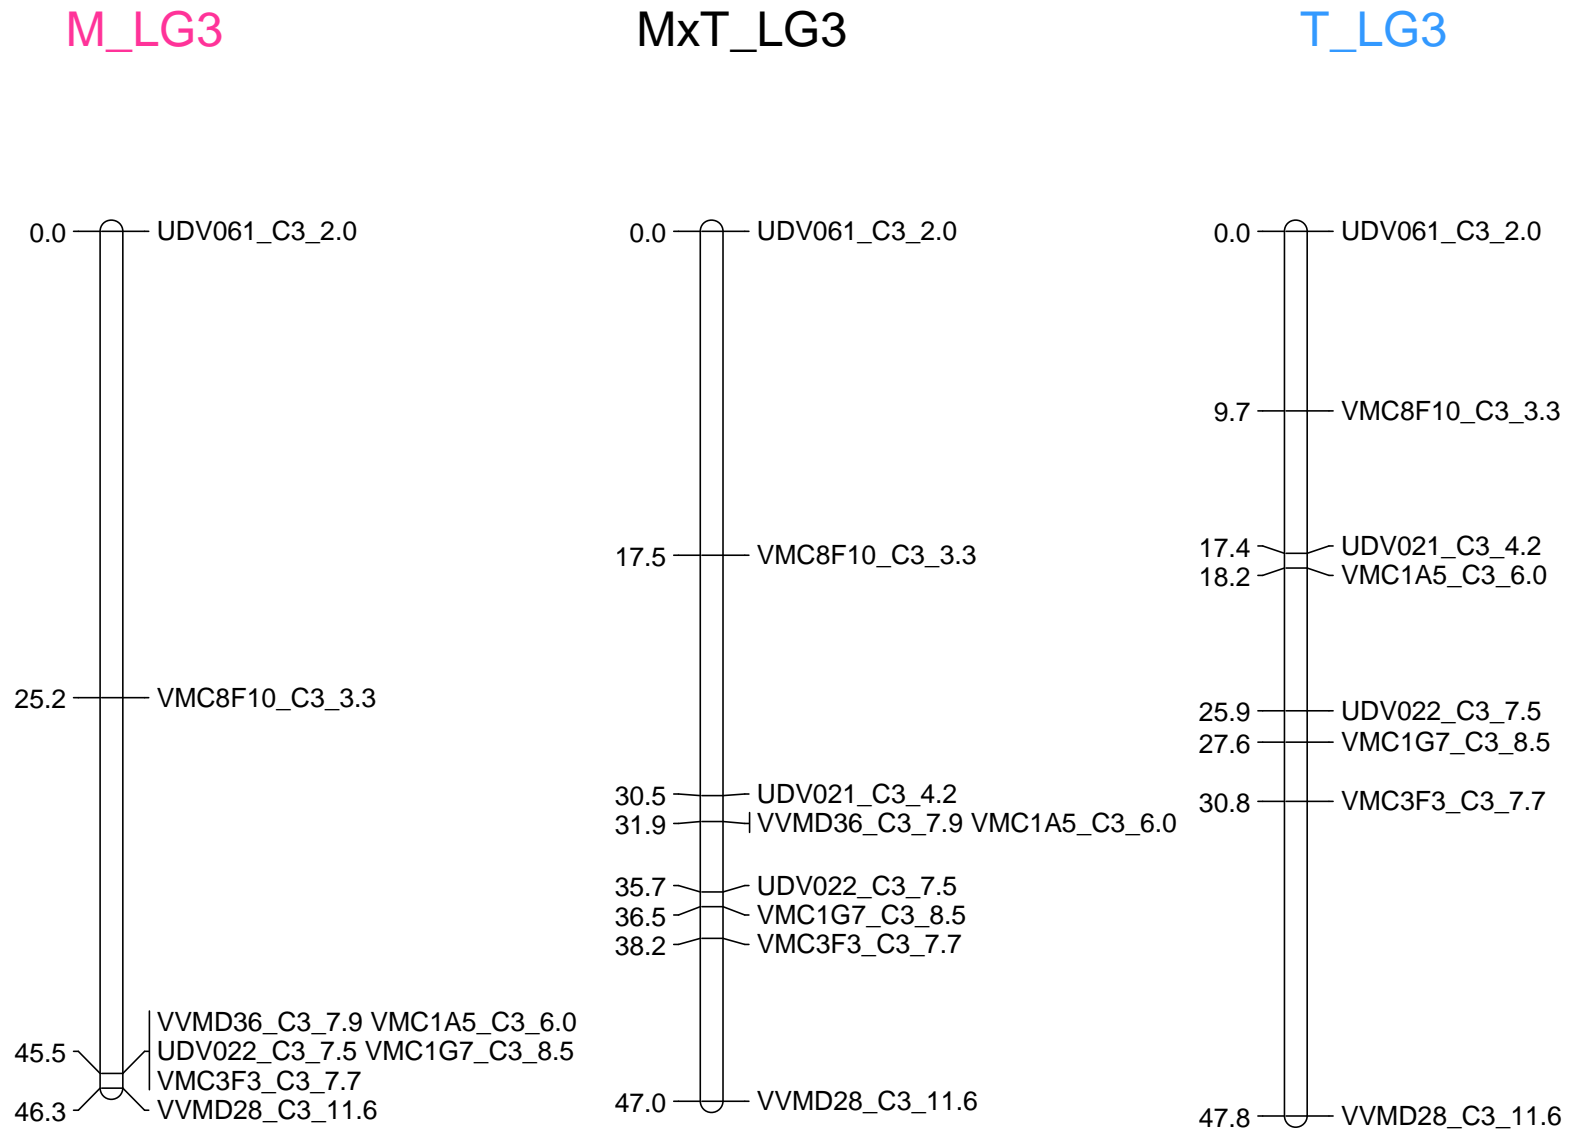

**Figure S4.** The parental and the consensus MxT linkage map.

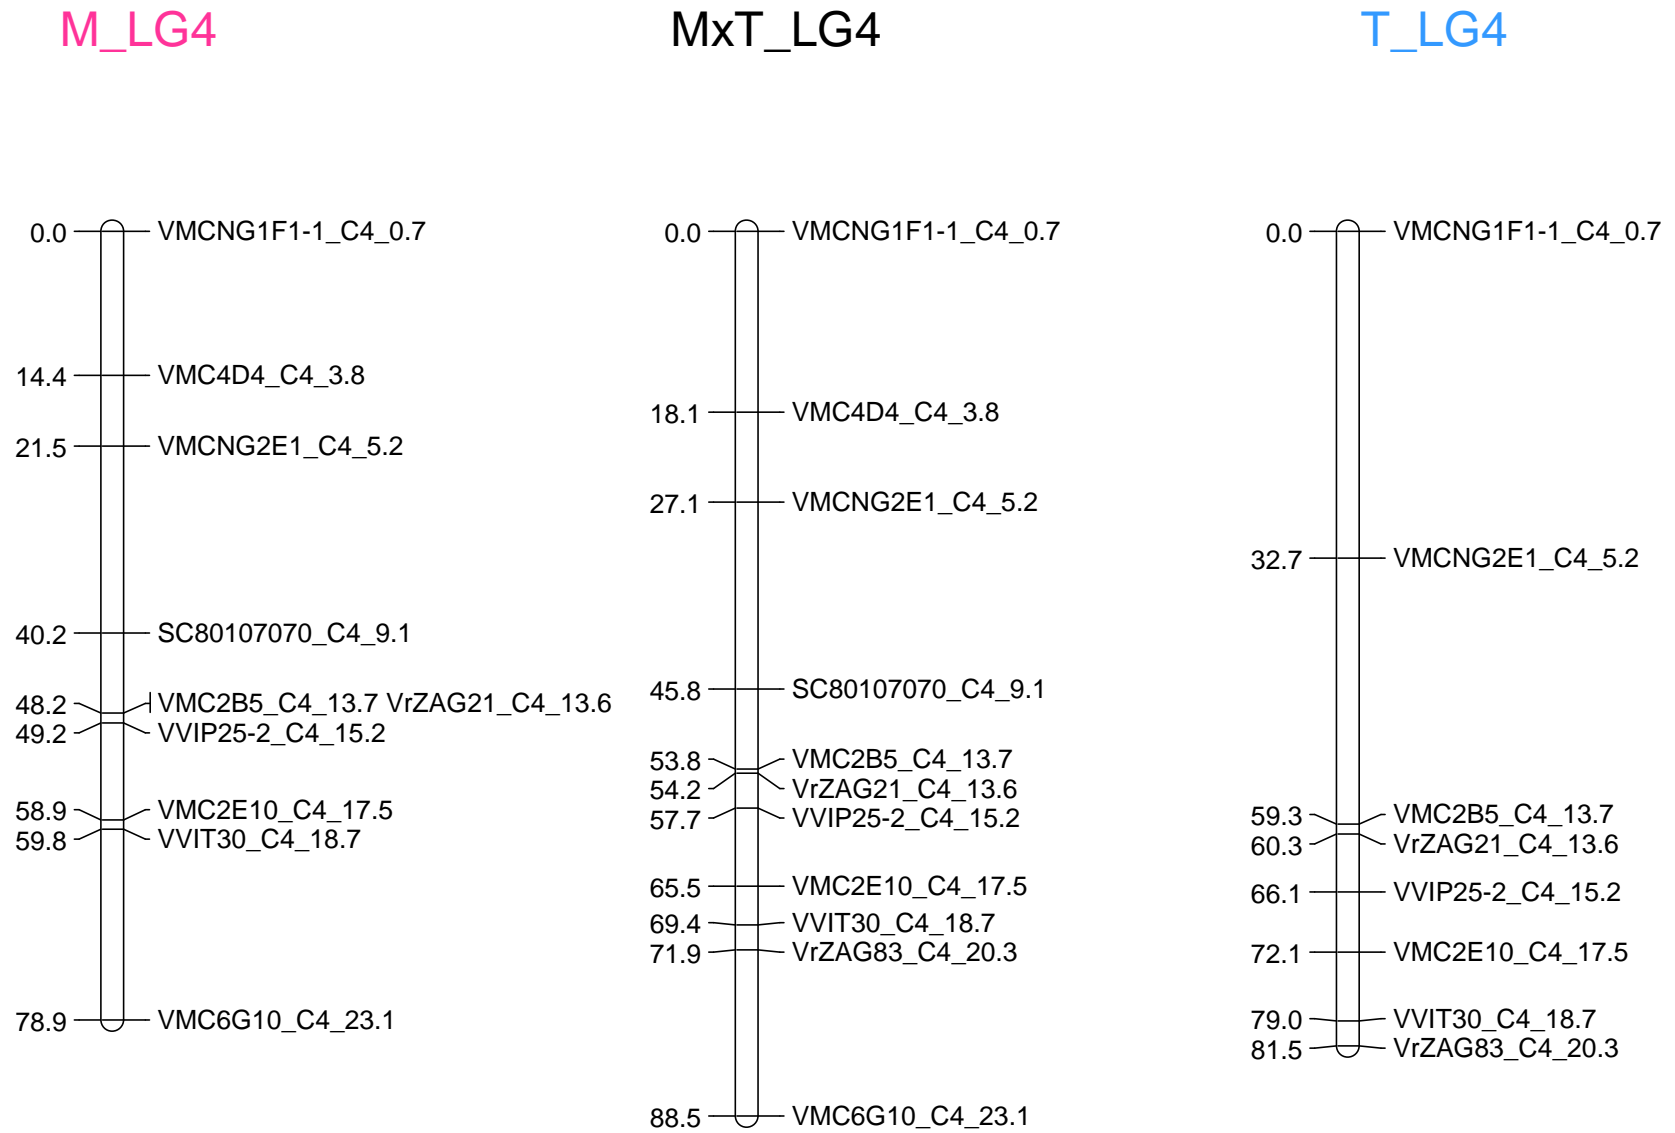

**Figure S4.** The parental and the consensus MxT linkage map.

M\_LG5

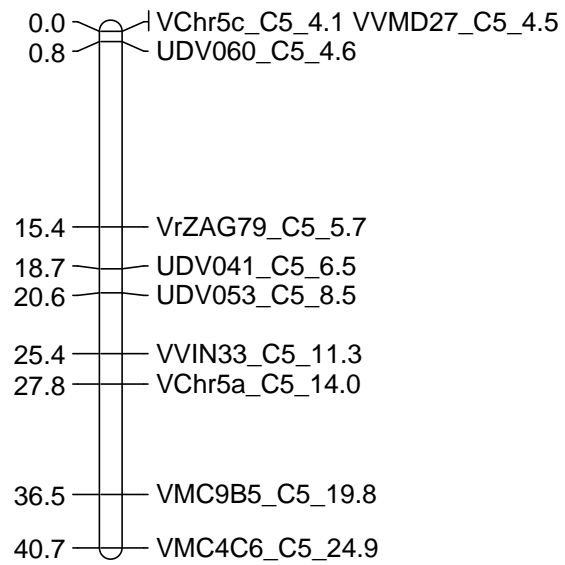

MxT\_LG5

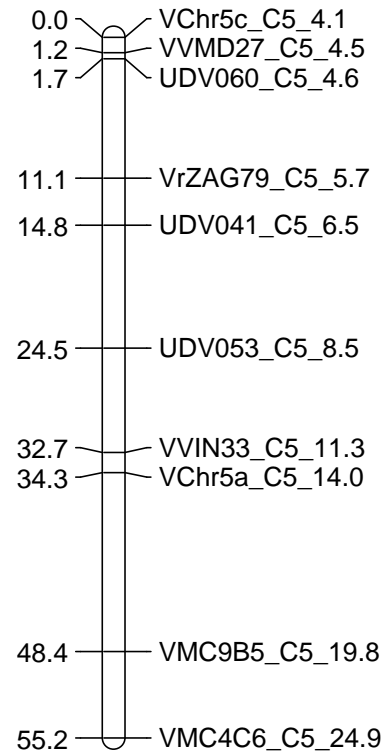

T\_LG5

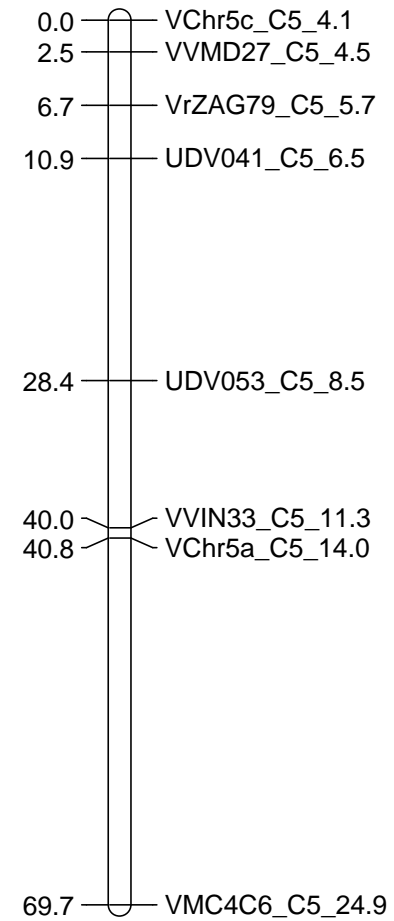

**Figure S4.** The parental and the consensus MxT linkage map.

M\_LG6

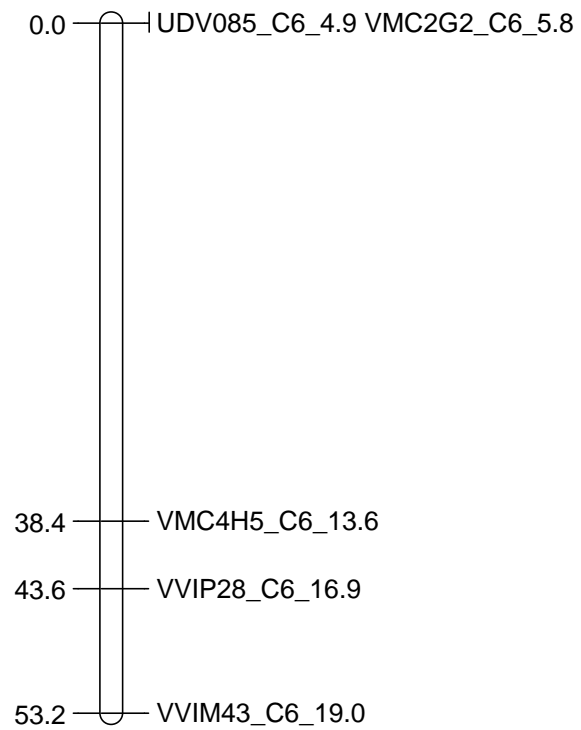

MxT\_LG6

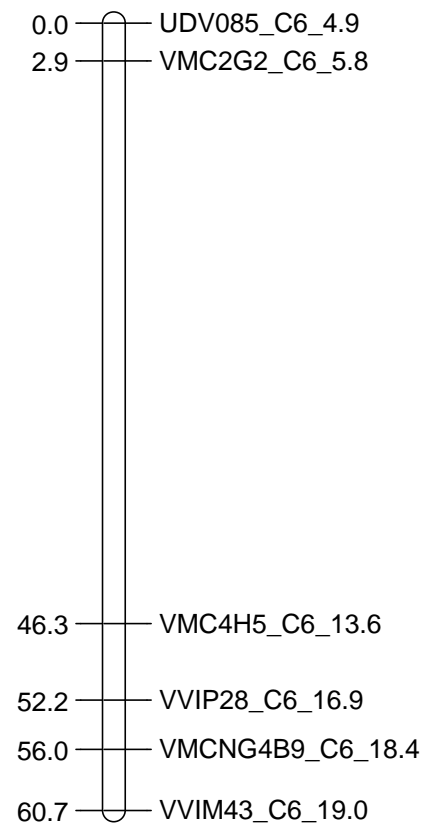

T\_LG6

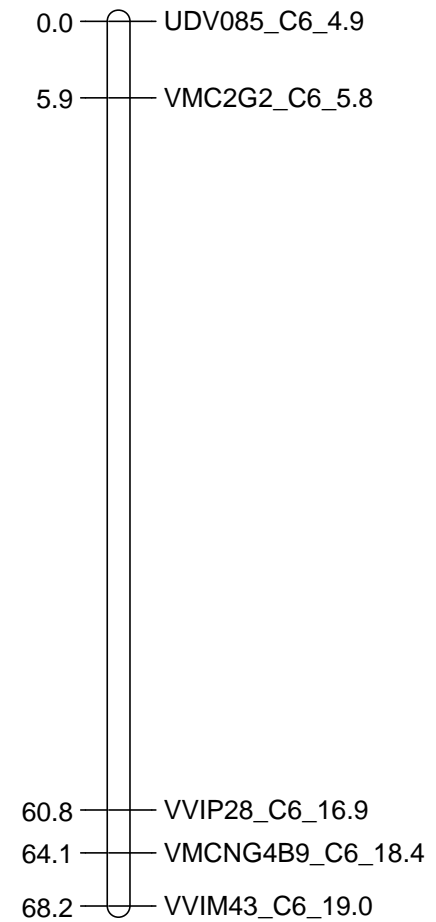

**Figure S4.** The parental and the consensus MxT linkage map.

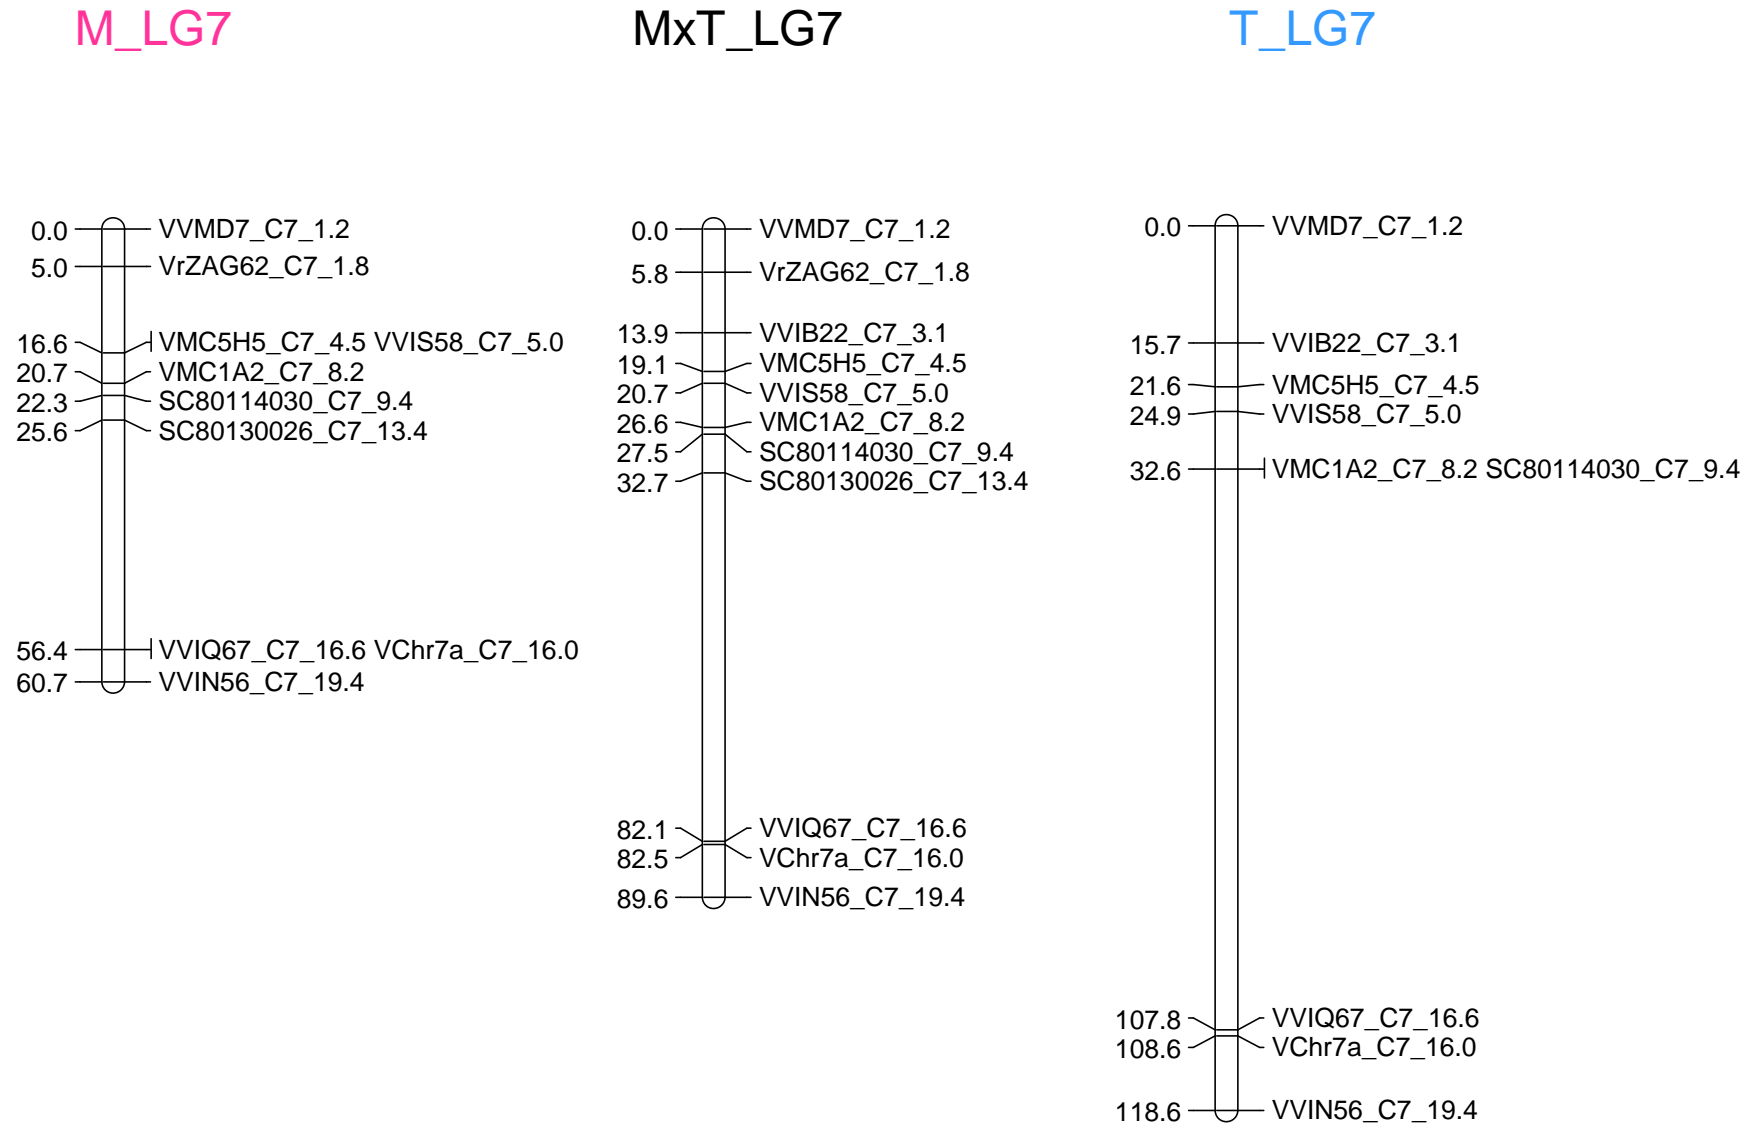

**Figure S4.** The parental and the consensus MxT linkage map.

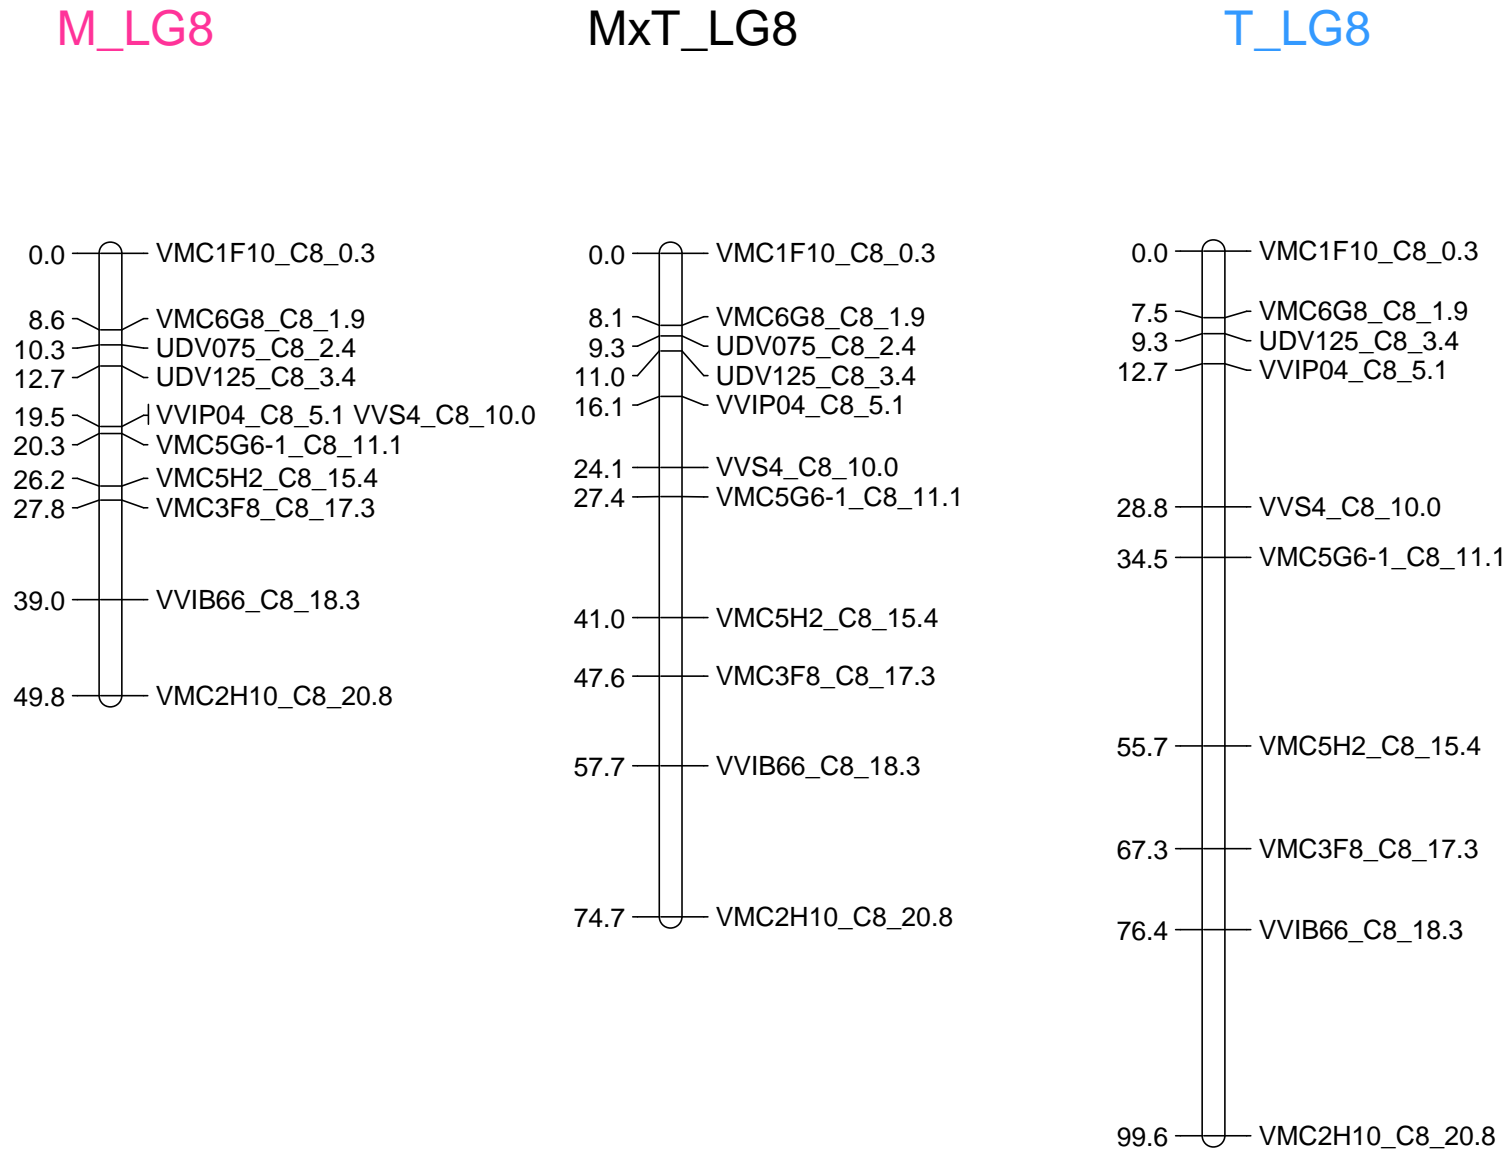



**Figure S4.** The parental and the consensus MxT linkage map.

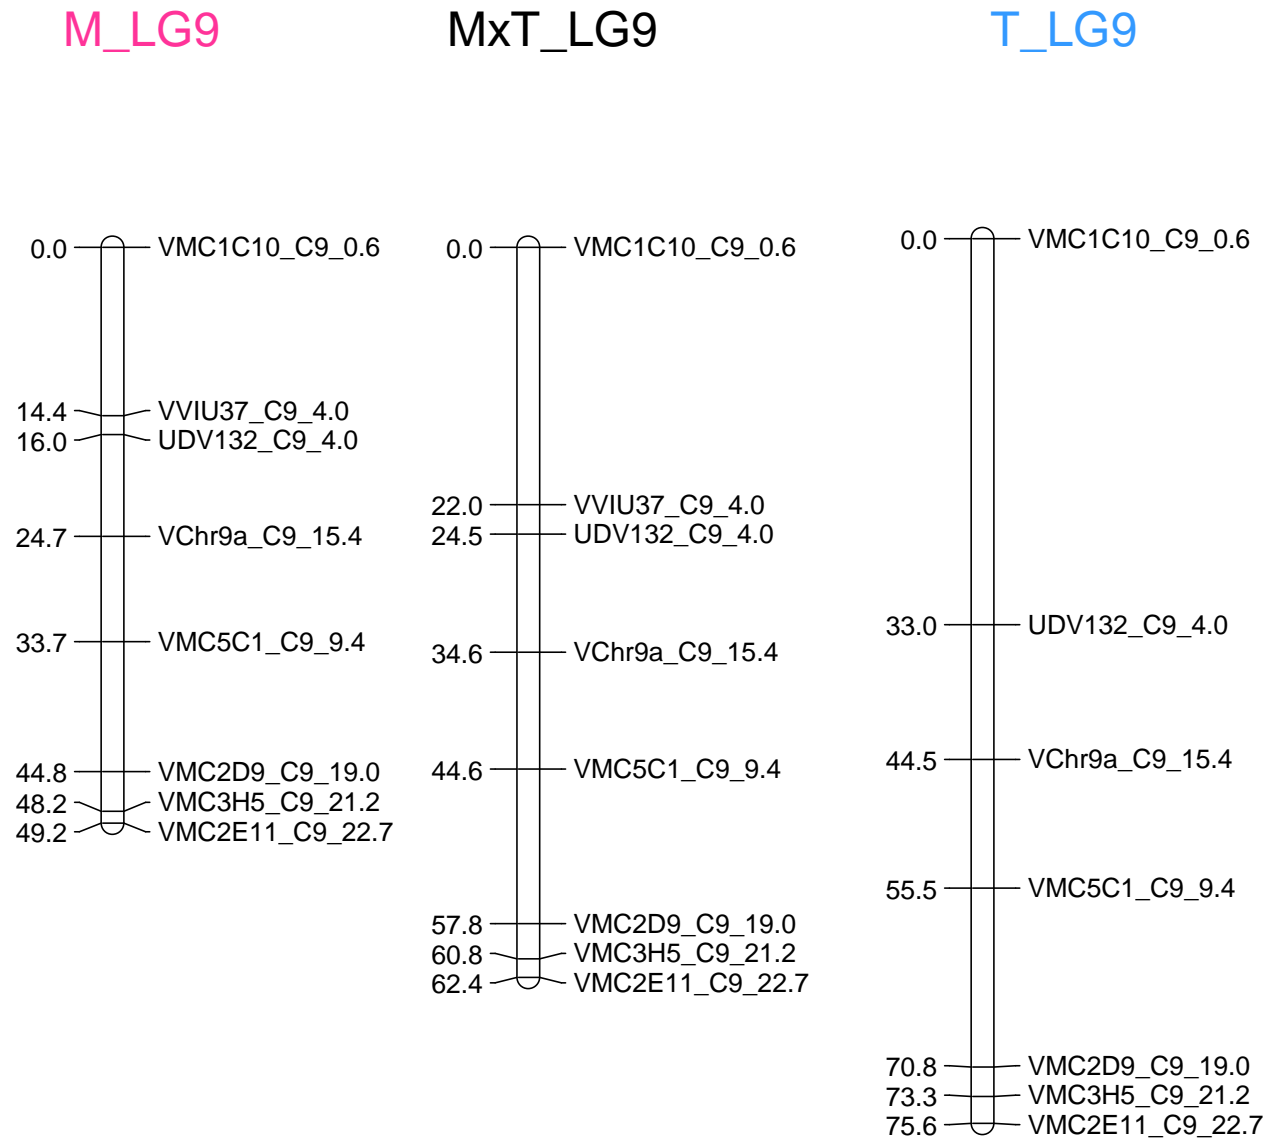

**Figure S4.** The parental and the consensus MxT linkage map.

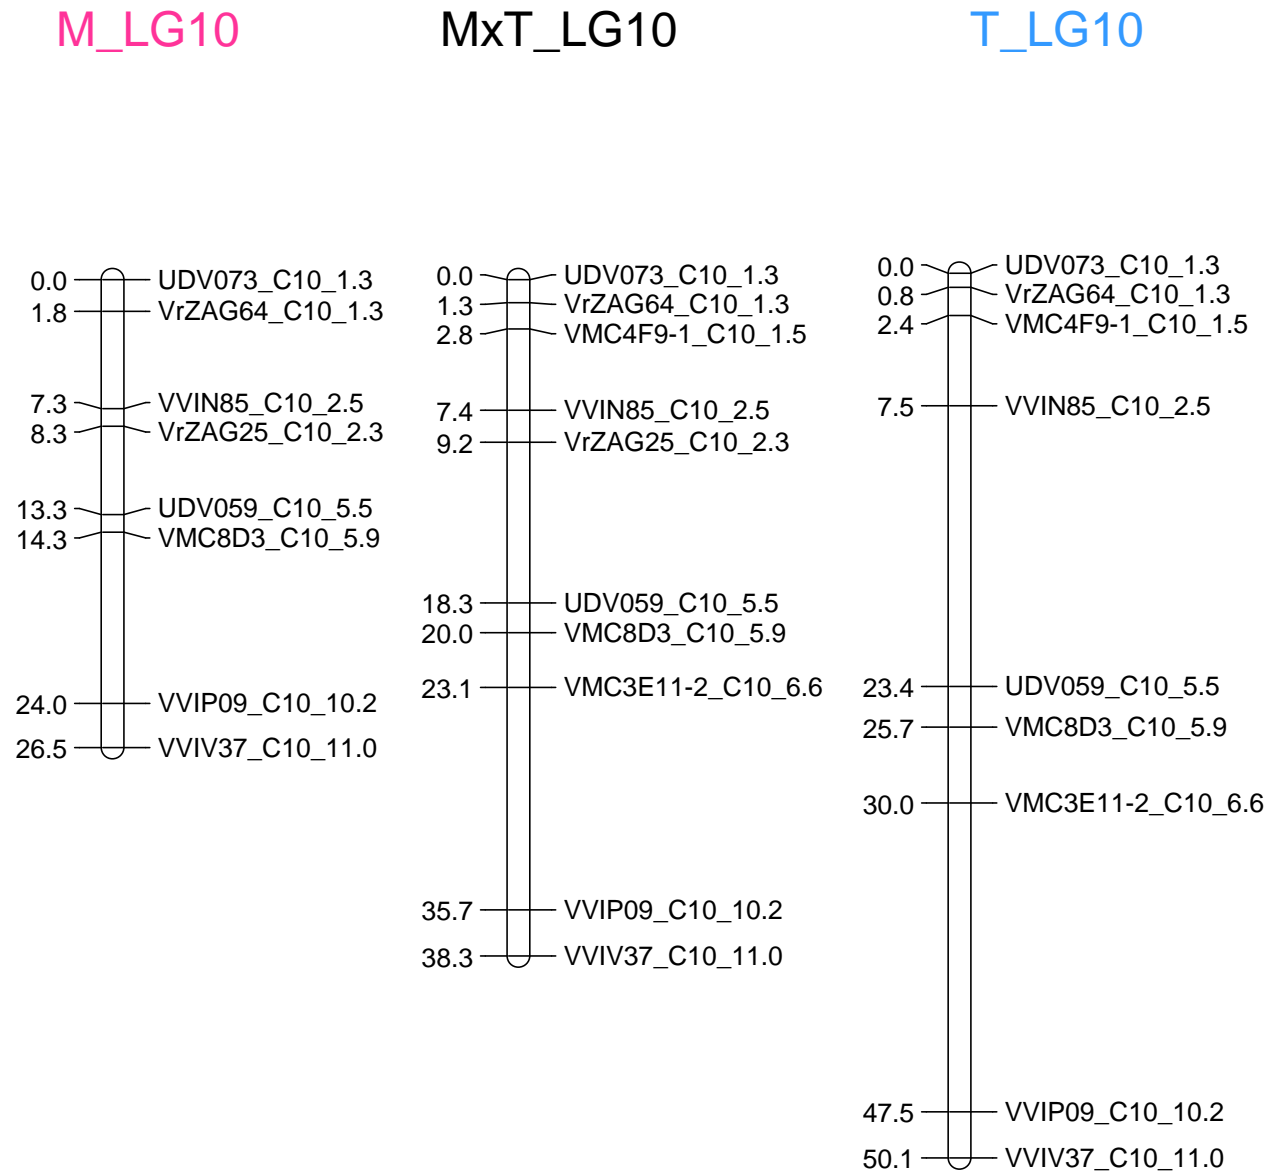

**Figure S4.** The parental and the consensus MxT linkage map.

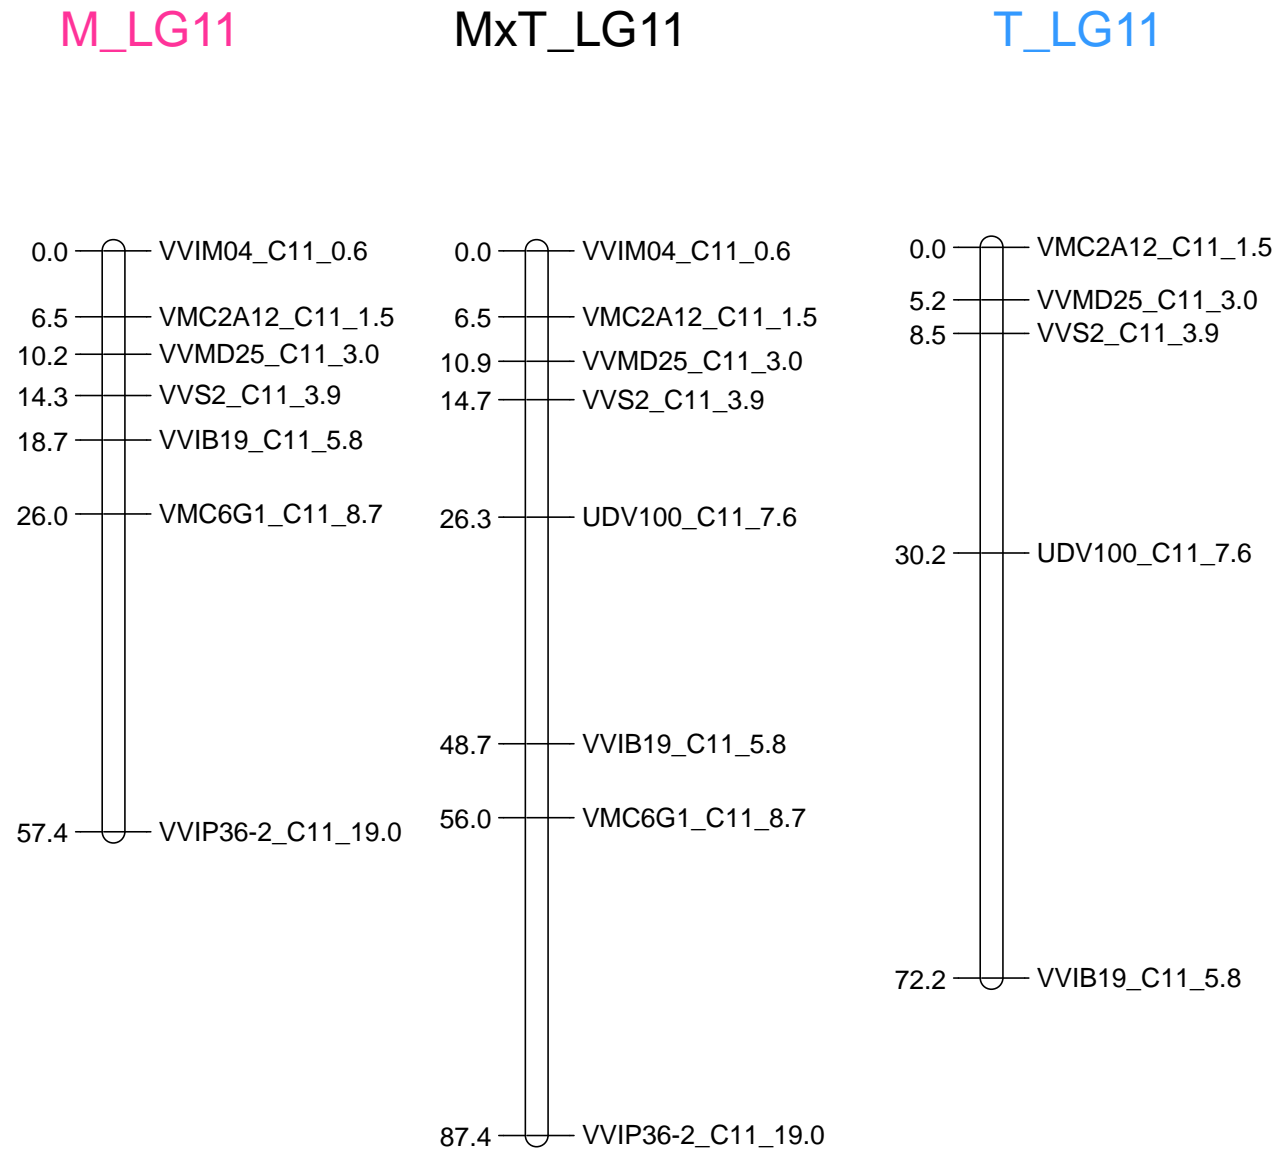

**Figure S4.** The parental and the consensus MxT linkage map.

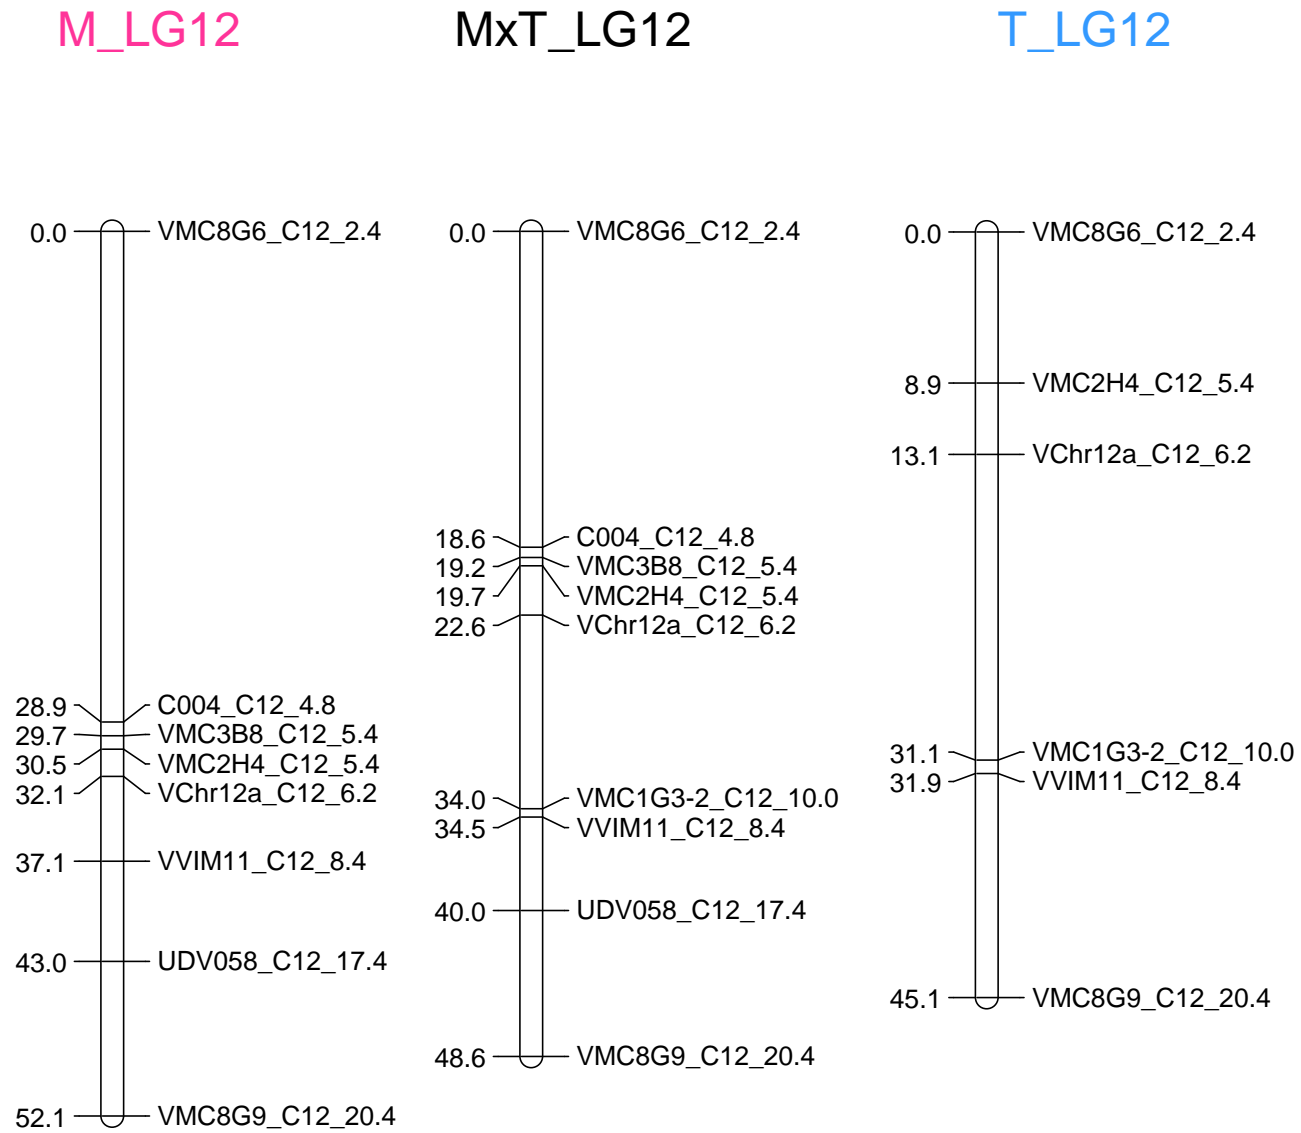

**Figure S4.** The parental and the consensus MxT linkage map.

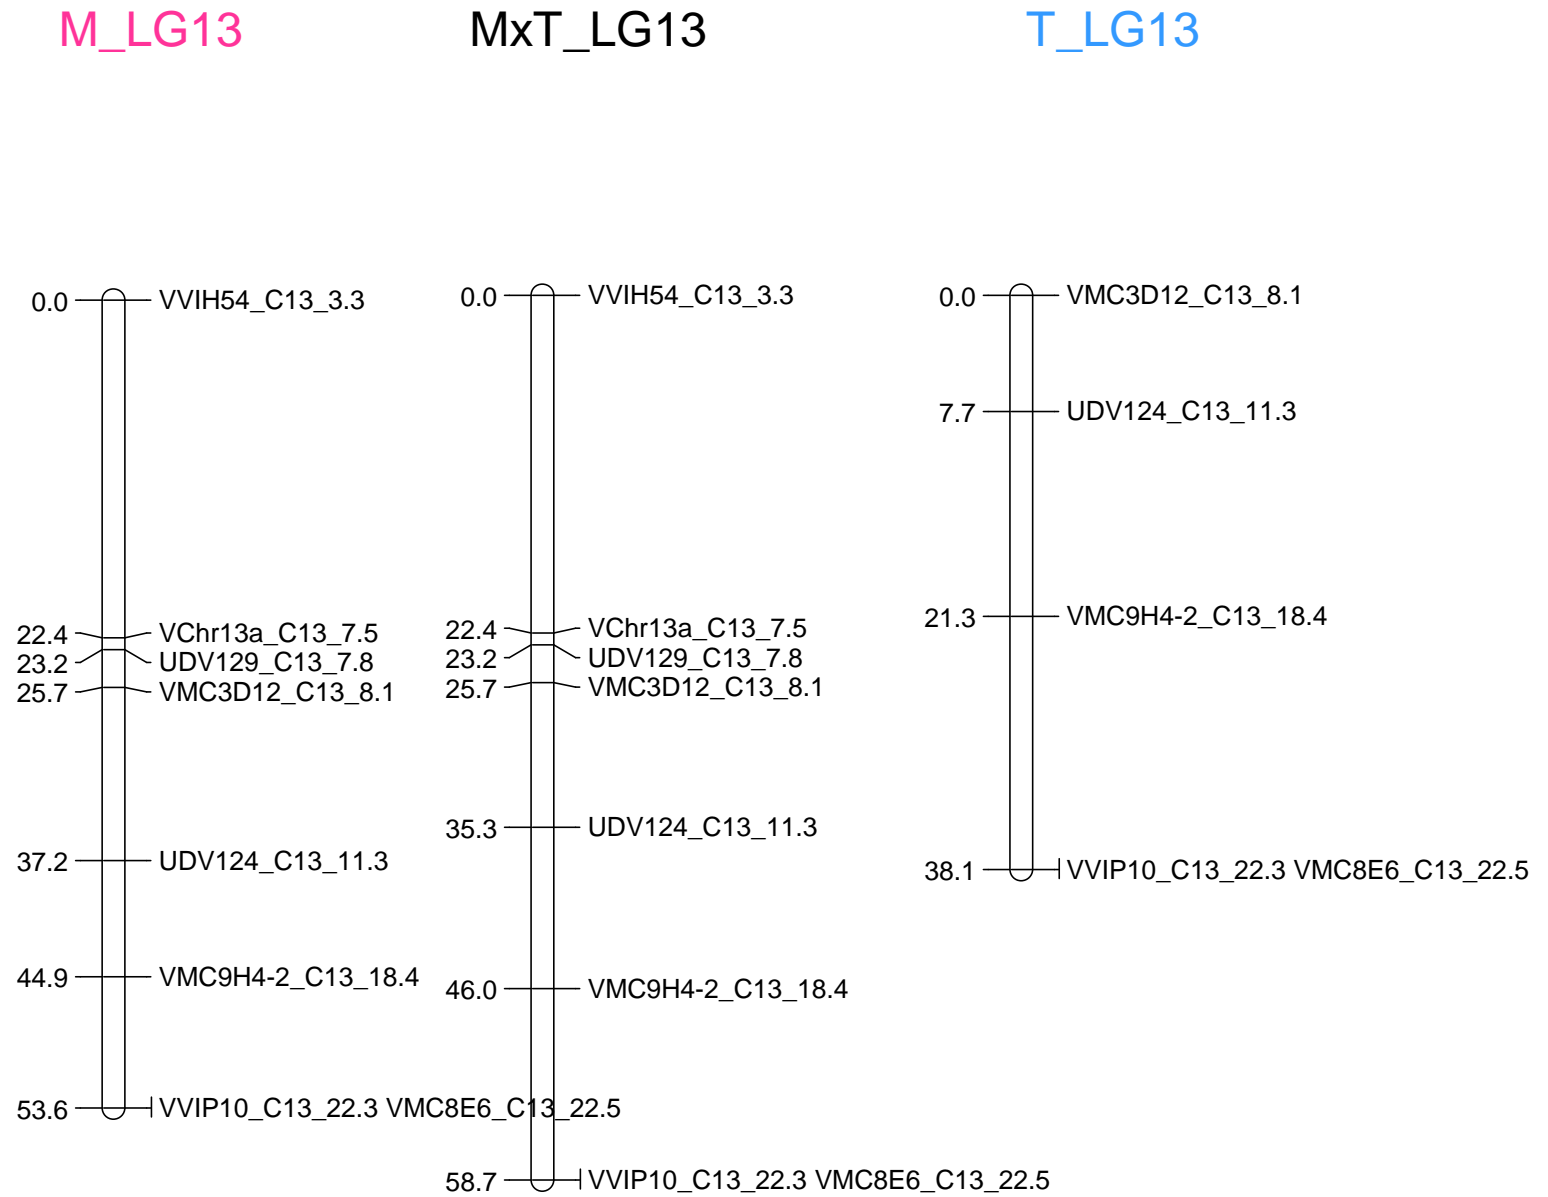

**Figure S4.** The parental and the consensus MxT linkage map.

M\_LG14

MxT\_LG14

T\_LG14

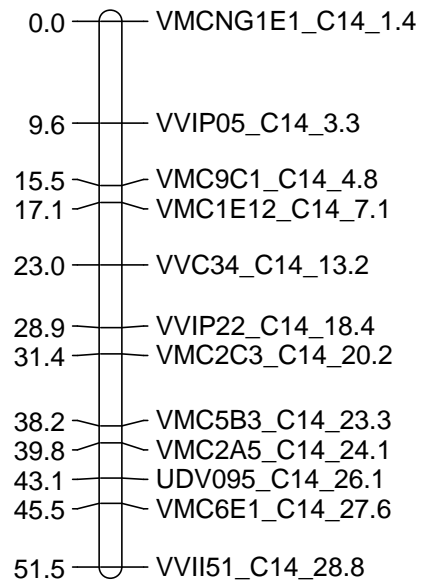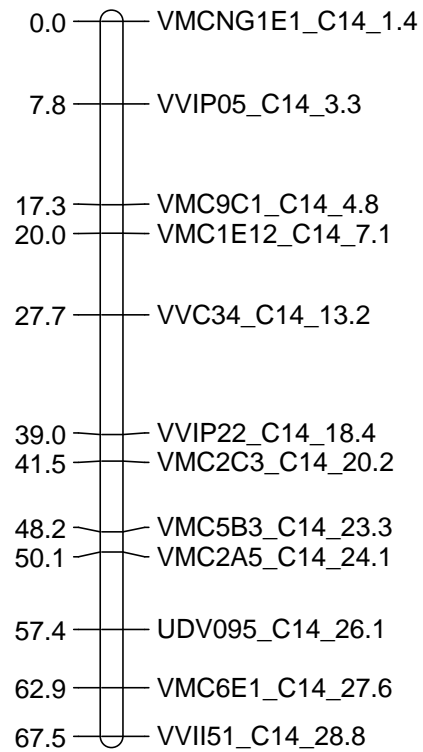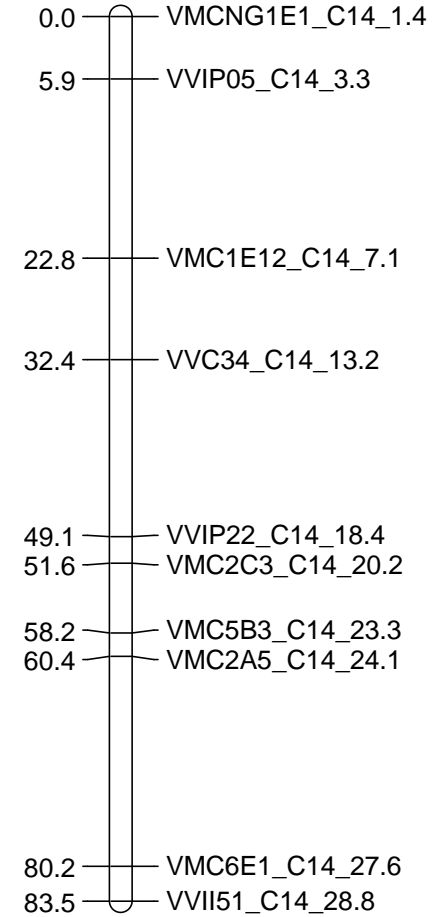

**Figure S4.** The parental and the consensus MxT linkage map.

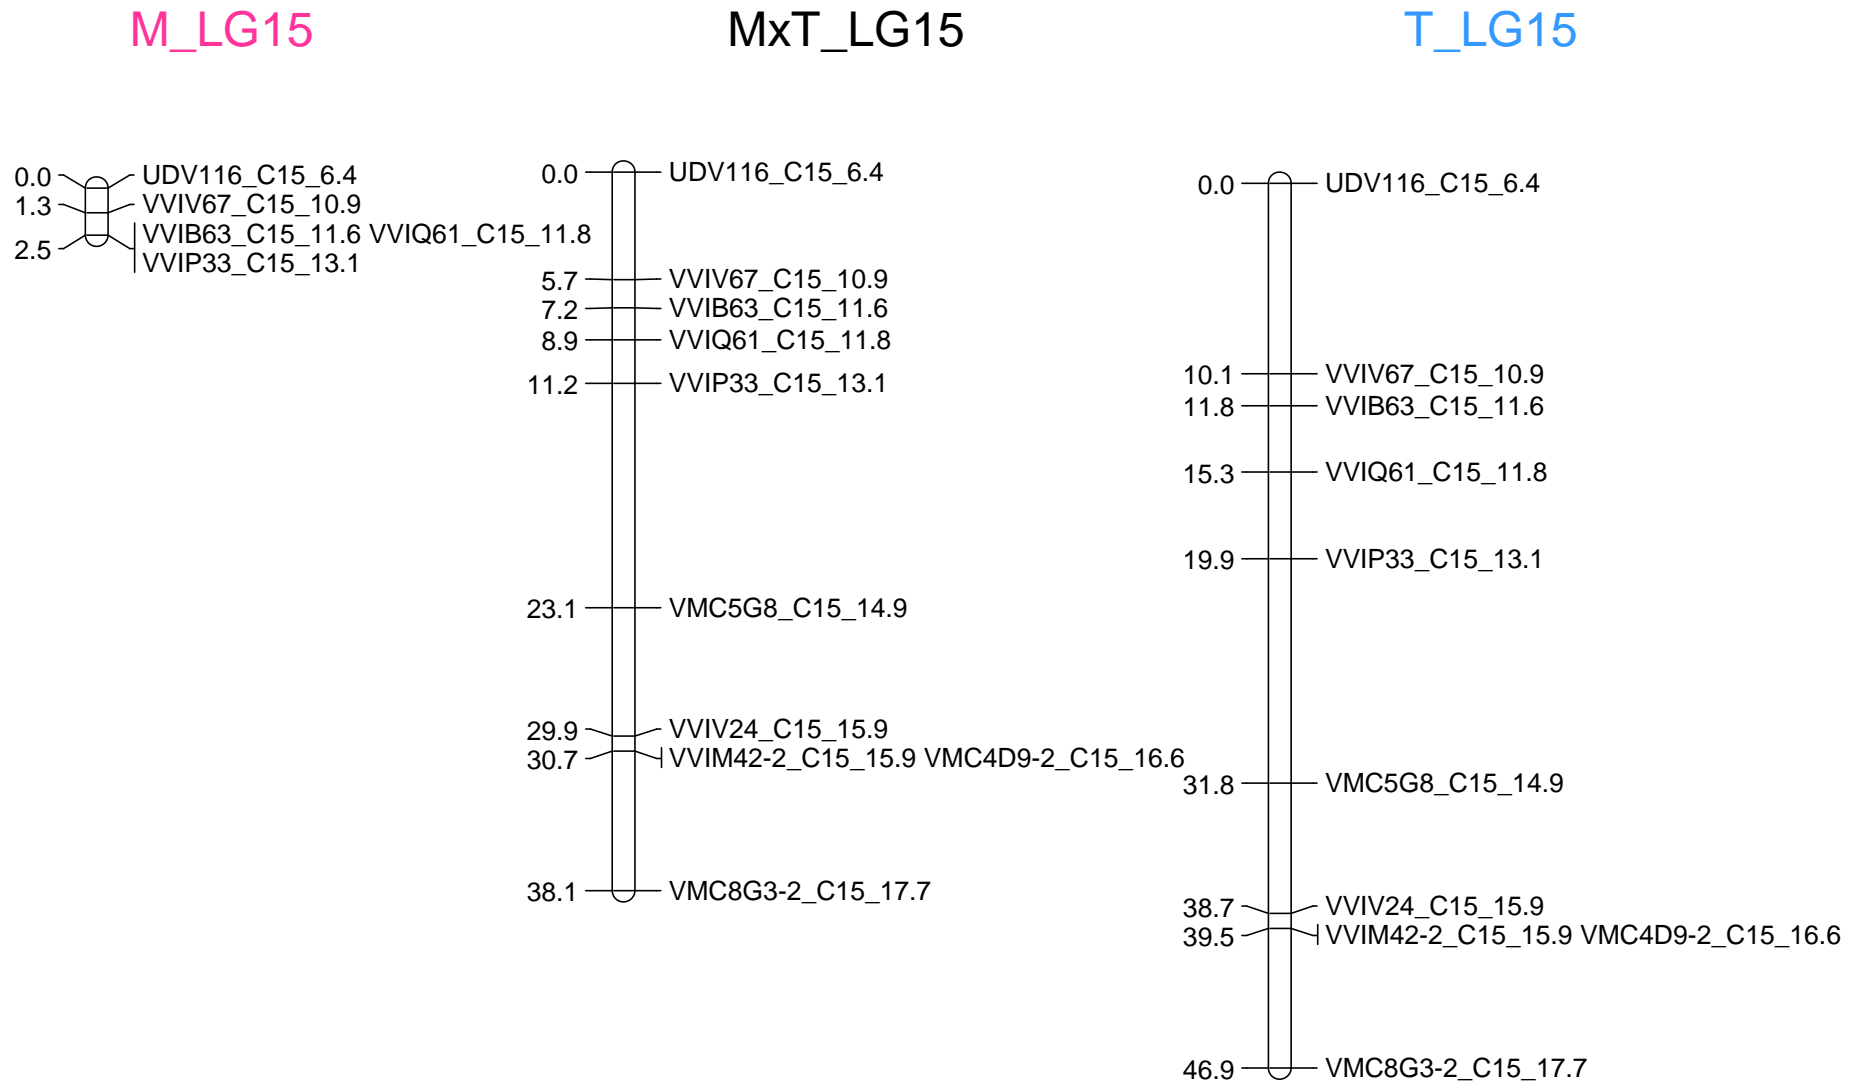

**Figure S4.** The parental and the consensus MxT linkage map.

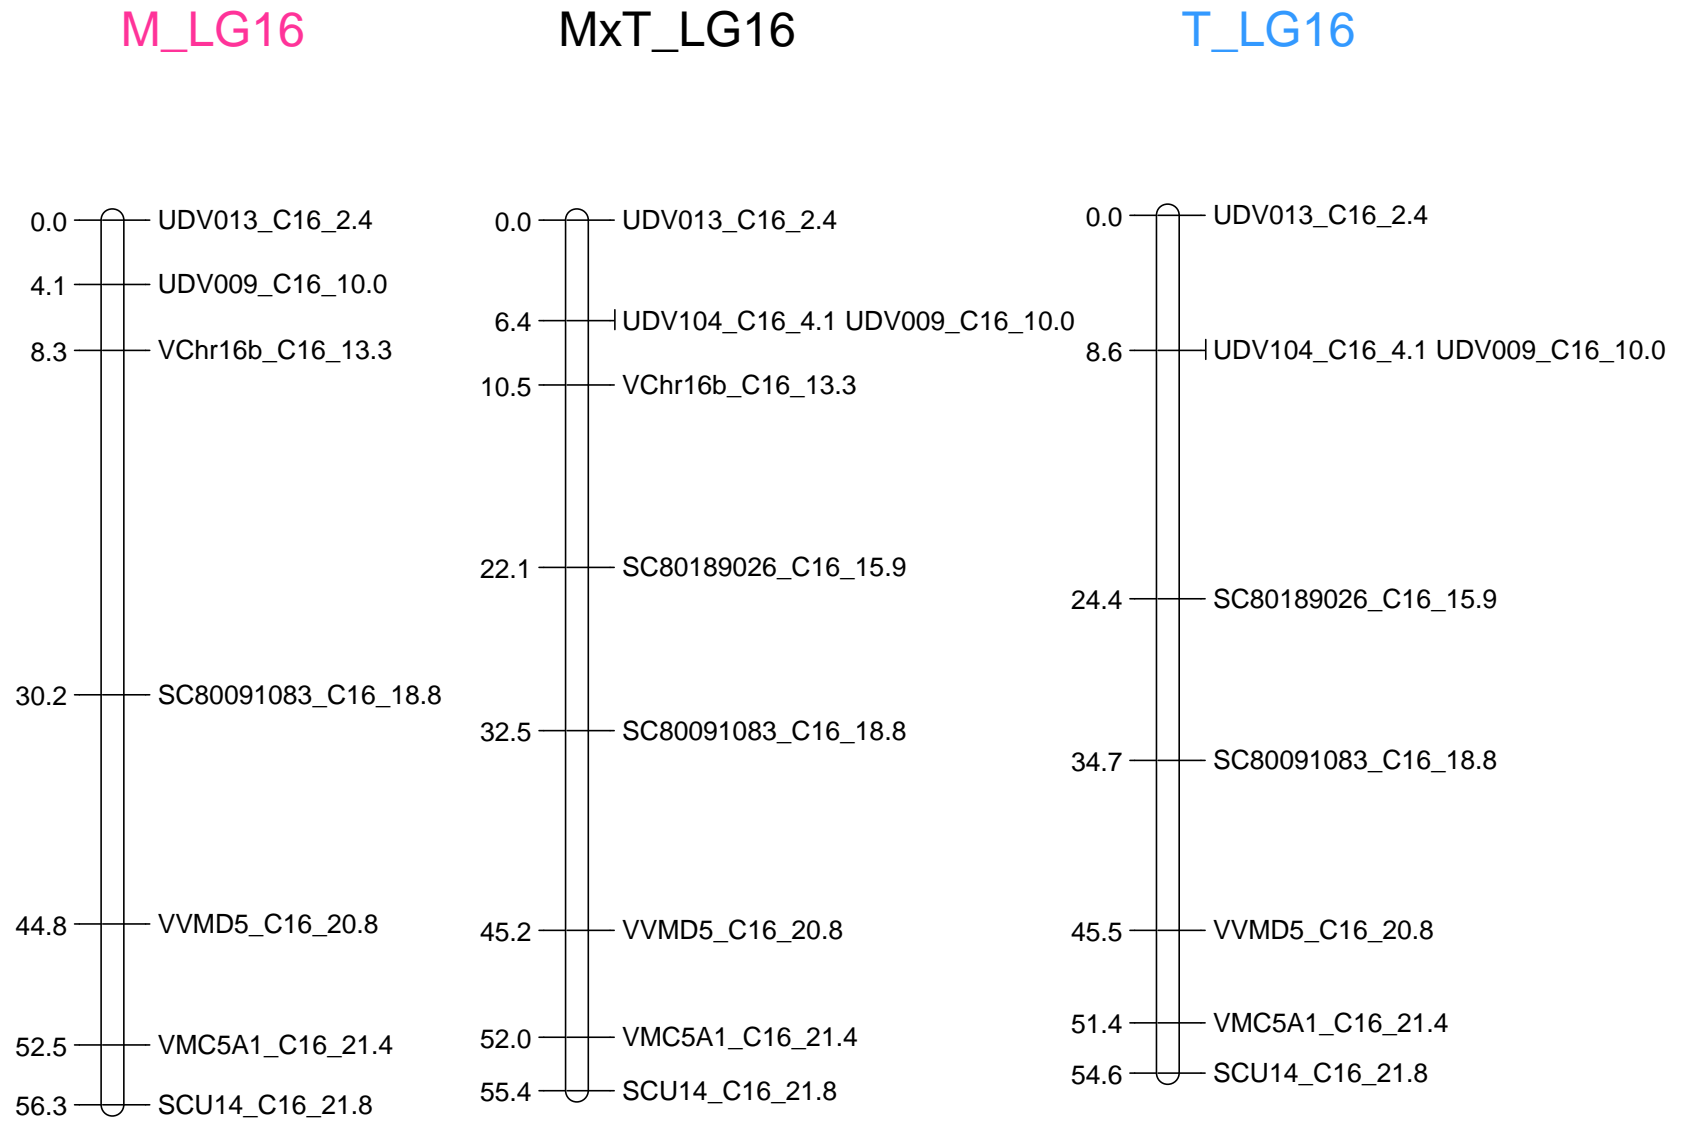



**Figure S4.** The parental and the consensus MxT linkage map.

M\_LG17

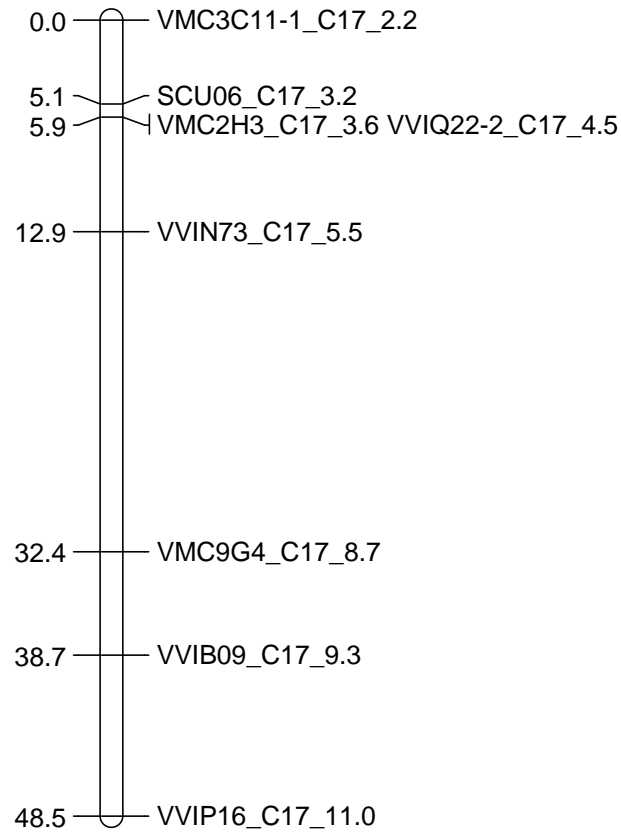

MxT\_LG17

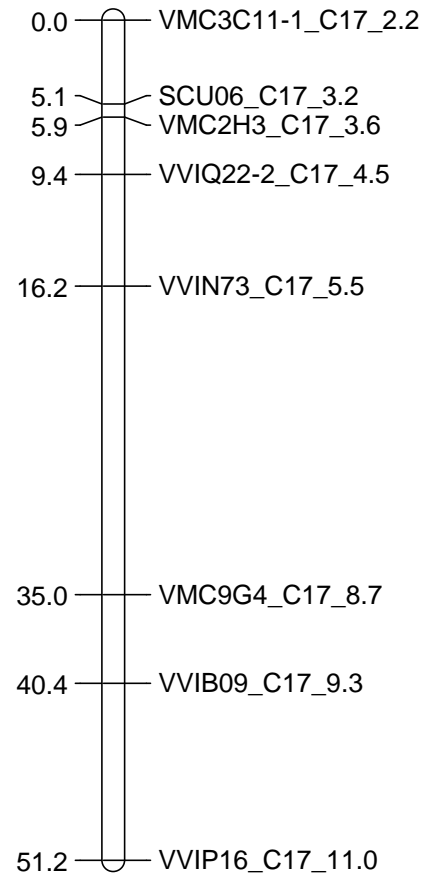

T\_LG17

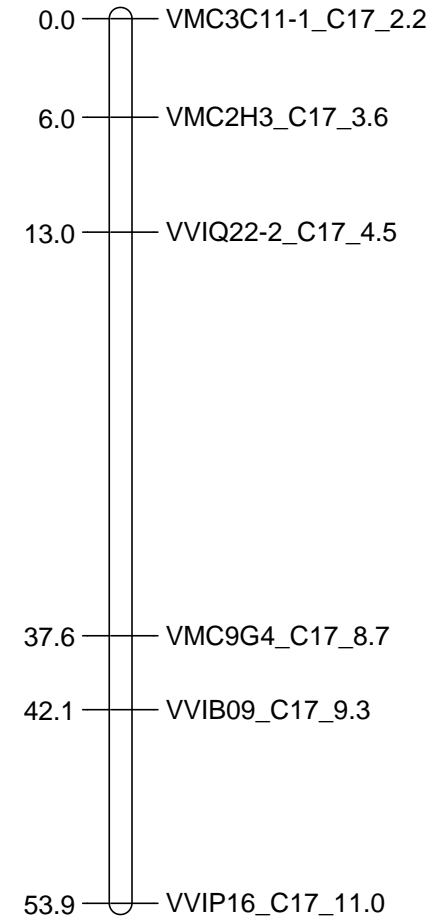

**Figure S4.** The parental and the consensus MxT linkage map.

M\_LG18

MxT\_LG18

T\_LG18

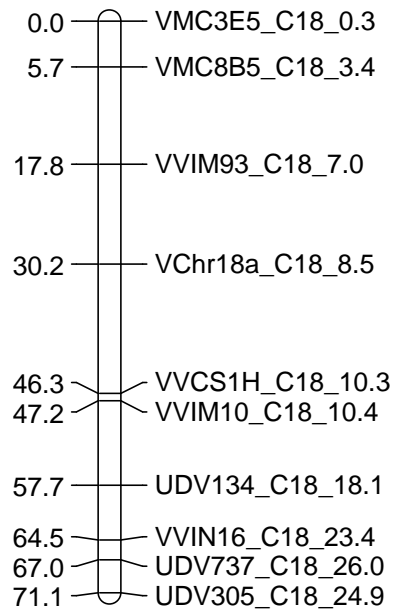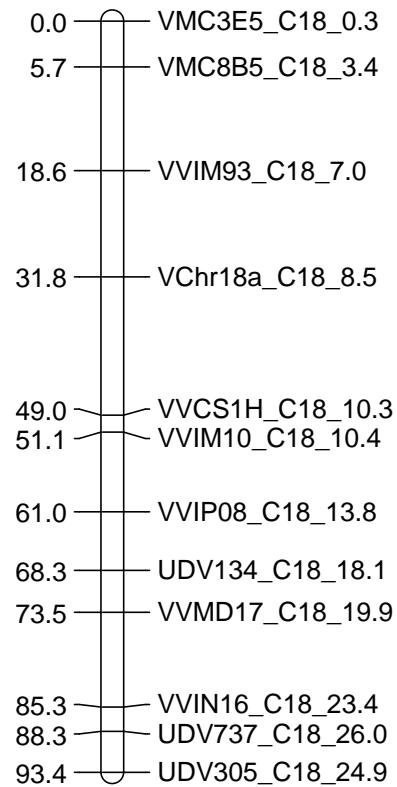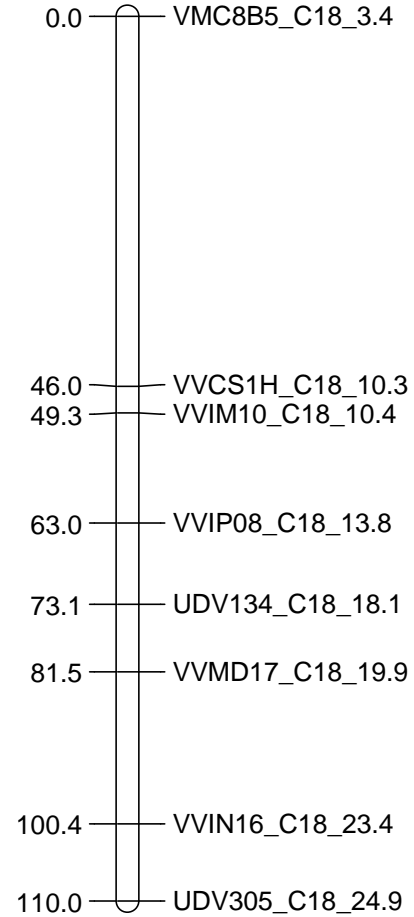

**Figure S4.** The parental and the consensus MxT linkage map.

M\_LG19

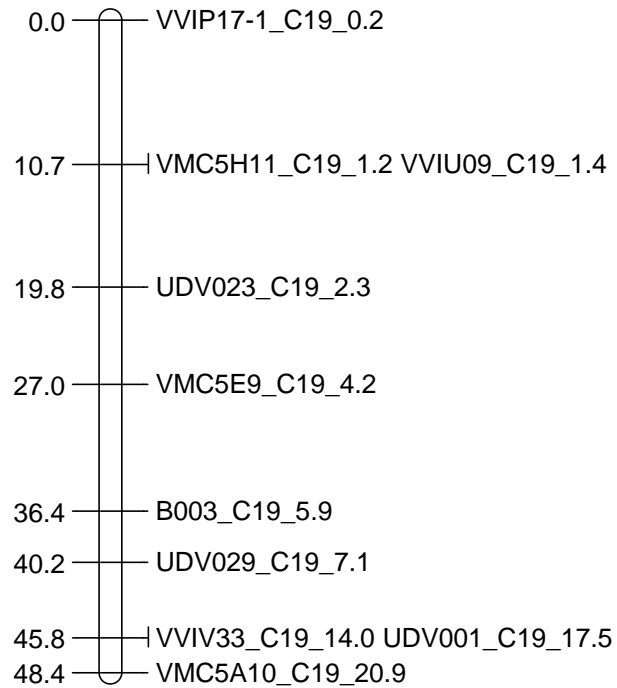

MxT\_LG19

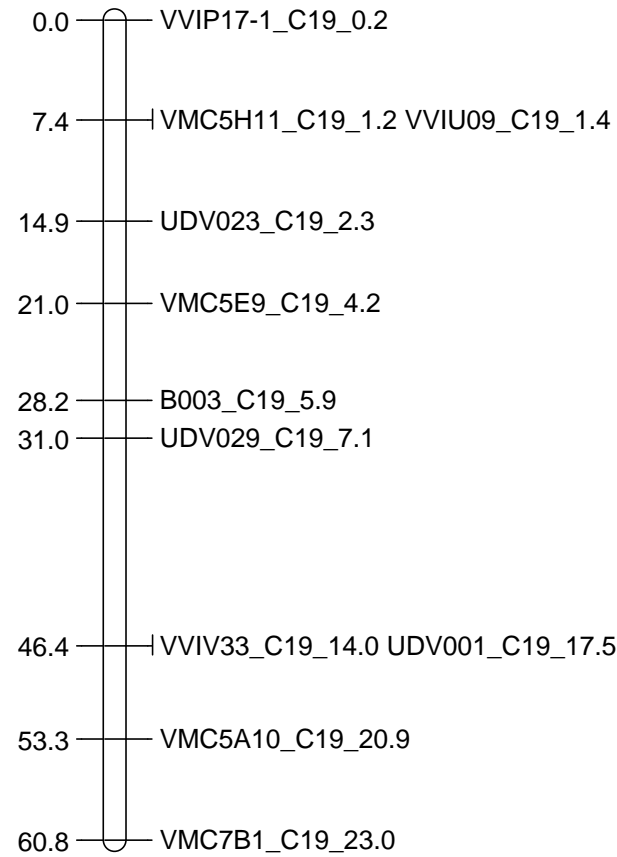

T\_LG19

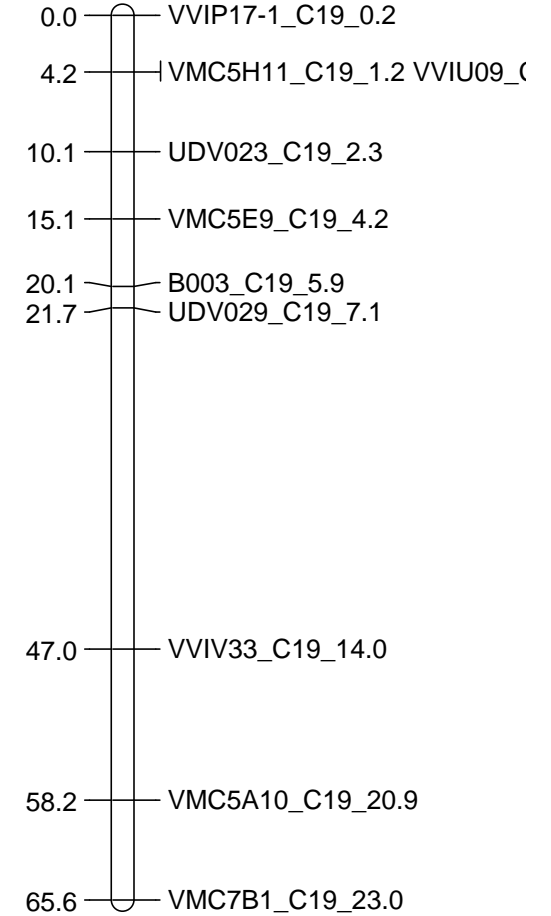

Supplement: Image_4.pdf [file Image_4.pdf]
